# Supplementary material
Source: PubMed Central journal article supplement (PMC5609510)
Supplement: NIHMS875371-supplement-2.pdf [file NIHMS875371-supplement-2.pdf]

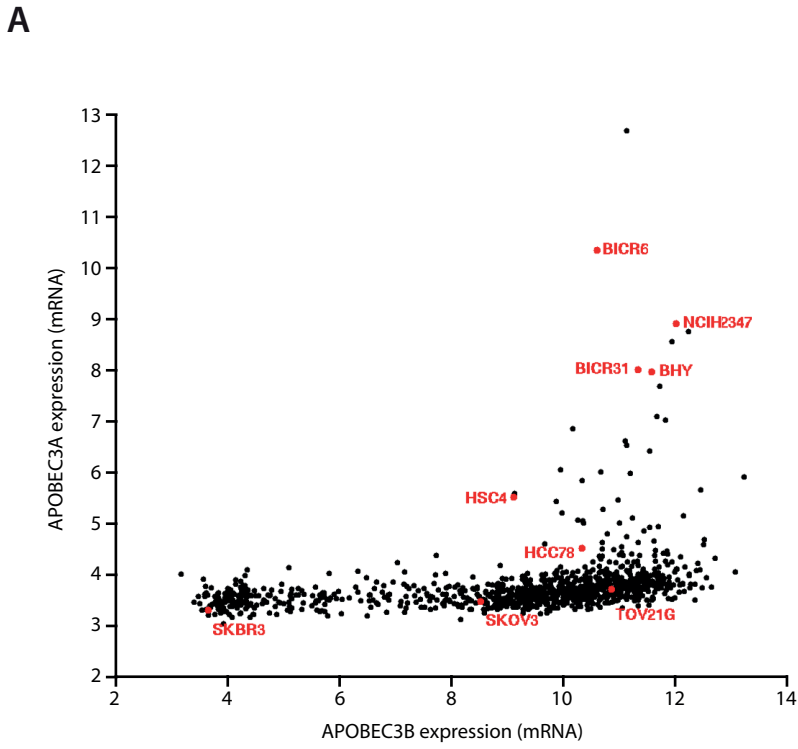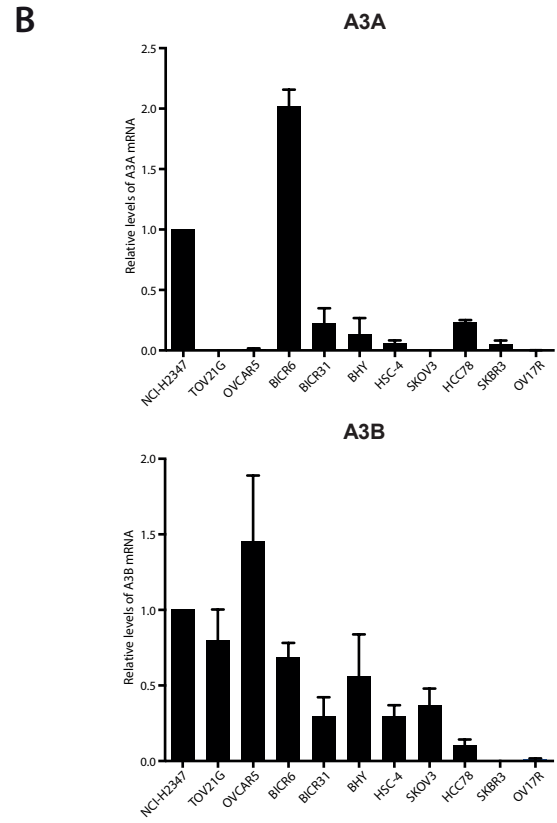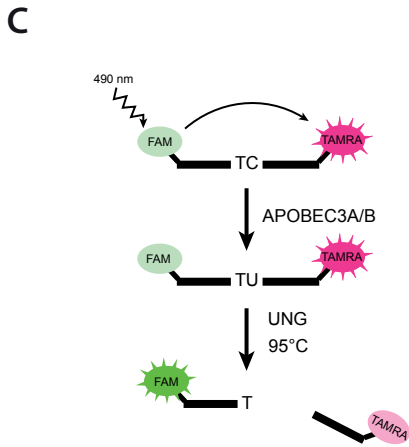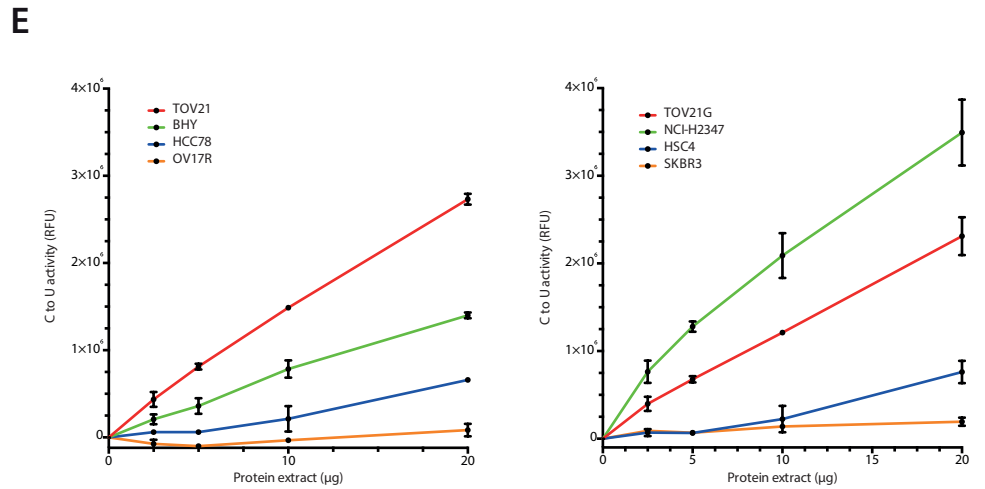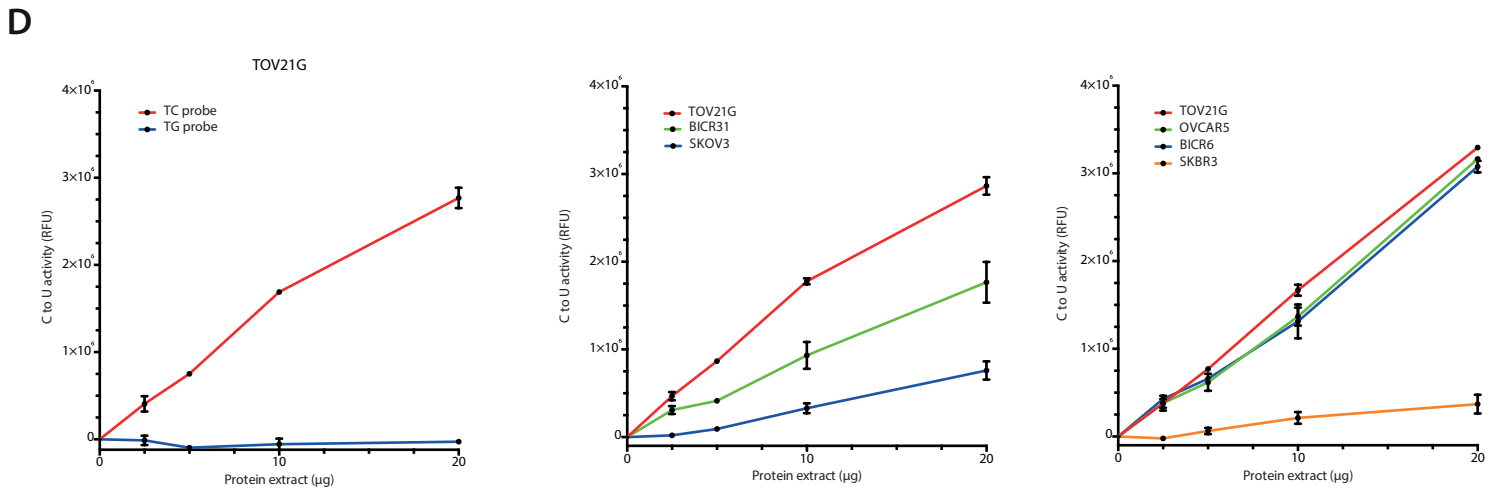

**Supplementary Figure S1. Expression and activity of APOBEC3A and APOBEC3B in cancer cell lines.** **A.** Analysis of A3A and A3B mRNA expression in 1,019 cancer cell lines. The cell lines selected for subsequent studies are labeled in red. **B.** Relative levels of A3A and A3B mRNAs in the indicated cell lines. mRNA levels were determined by RT-qPCR. The levels of A3A and A3B mRNAs in NCI-H-2347 cells are defined as 1. Error bar: S. D. (n = 3). **C.** A schematic diagram of the DNA deaminase activity assay for APOBEC3A/B. The TC probe is a specific substrate of APOBEC3A and APOBEC3B. **D.** The APOBEC3A and APOBEC3B activity in TOV21G cells was measured using increasing amounts of cell extracts and the TC probe. The TG probe was used as a negative control. Error bar: S. D. (n = 3). **E.** The APOBEC3A and APOBEC3B activities in the indicated cell lines were measured using increasing amounts of cell extracts. TOV21G cells were used as a control in all reactions. Error bar: S. D. (n = 3).
