# Supplementary material
Source: PubMed Central journal article supplement (PMC5609510)
Supplement: NIHMS875371-supplement-3.pdf [file NIHMS875371-supplement-3.pdf]

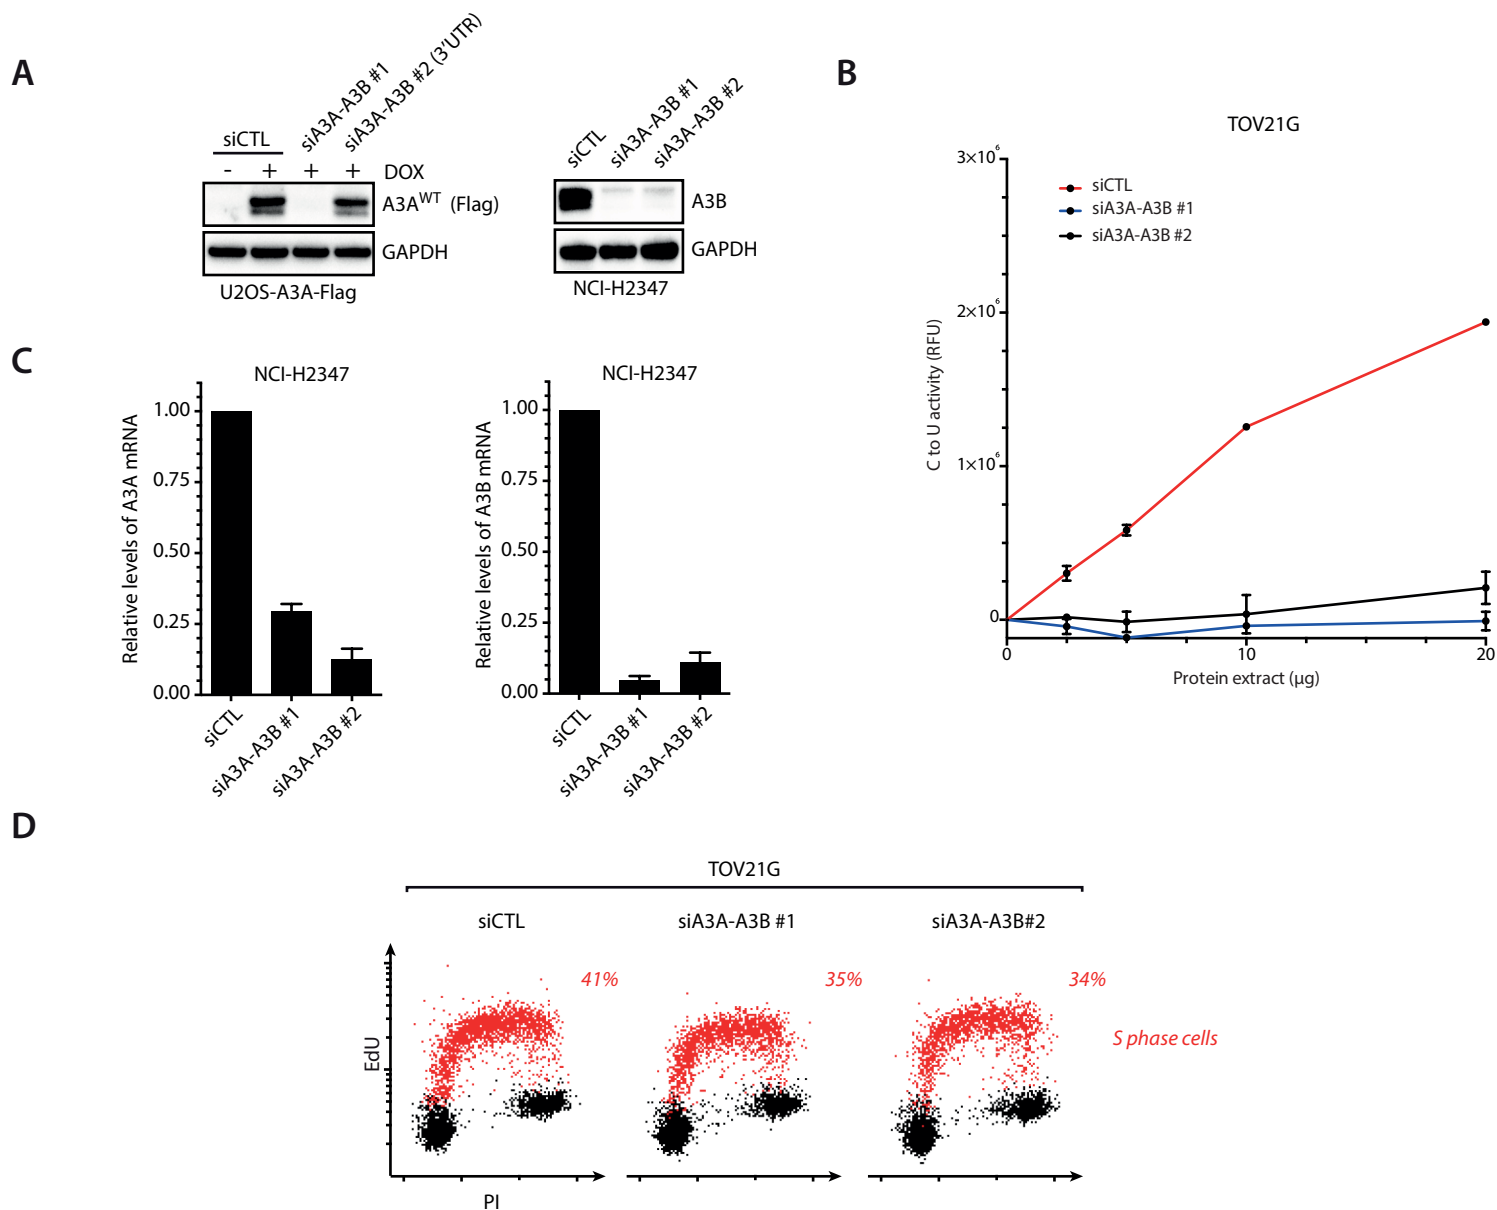

**Supplementary Figure S2. Knockdown of APOBEC3A and APOBEC3B by siRNAs.** A-B. Exogenous A3A<sup>WT</sup>, endogenous A3A, and endogenous A3B were knocked down by two independent siRNAs. Knockdown of A3A and A3B was confirmed by Western blot (A) or RT-qPCR (B). Error bar: S. D. (n = 2). Note that exogenous A3A<sup>WT</sup> was not knocked down by the siRNA targeting 3' UTR. C. The APOBEC3A and APOBEC3B activity in TOV21G cells was eliminated by knockdown of A3A and A3B. Error bar: S. D. (n = 3). D. Cell-cycle profiles of TOV21G cells transfected with control siRNA or two independent A3A-A3B siRNAs.
