# Supplementary material
Source: PubMed Central journal article supplement (PMC5609510)
Supplement: NIHMS875371-supplement-5.pdf [file NIHMS875371-supplement-5.pdf]

**A**

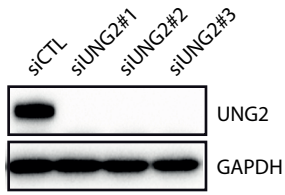

**B**

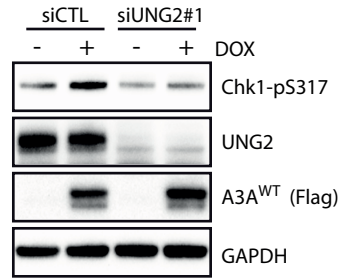

**C**

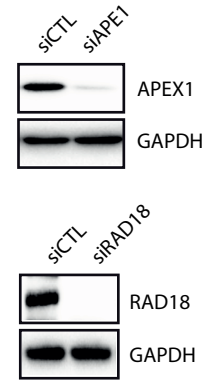

**D**

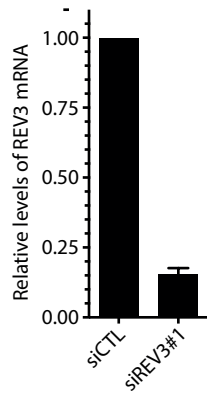

**F**

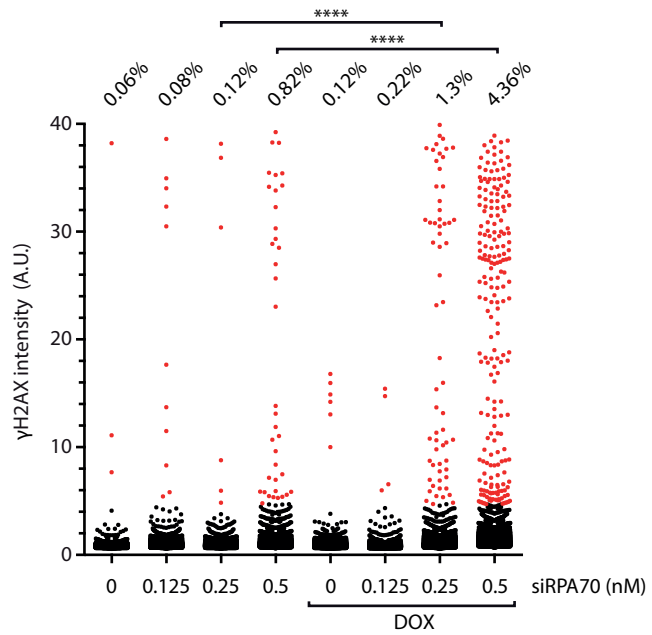

**E**

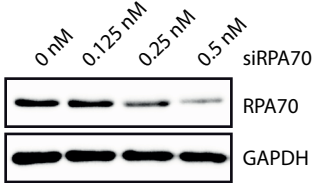

**G**

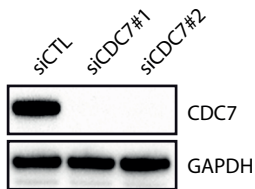

**H**

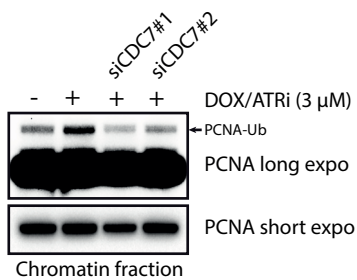

**I**

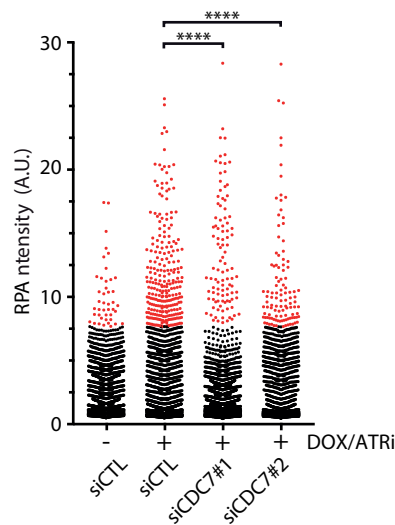

**J**

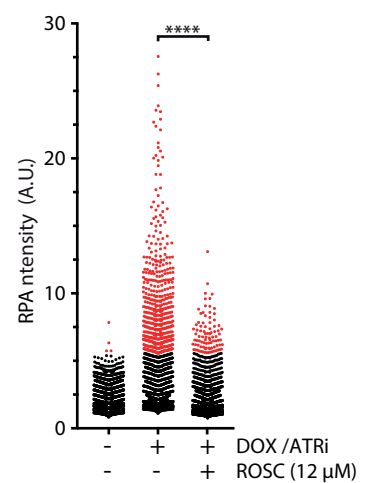

**Supplementary Figure S5. Factors affecting the induction of ssDNA and DNA damage by ATRi in APOBEC3A-expressing cells.**

**A.** Knockdown of UNG2 with 3 independent siRNAs. **B.** Inducible A3A<sup>WT</sup>-expressing cells were transfected with control or UNG2 siRNA, and left uninduced or induced with DOX. Levels of pChk1 were analyzed by Western blot. **C-D.** Knockdown of APE1 and RAD18 was confirmed by Western blot. Knockdown of REV3 was confirmed by RT-qPCR. **E.** Partial knockdown of RPA70 was confirmed by Western blot. **F.** Inducible A3A<sup>WT</sup>-expressing cells were transfected with increasing amounts of RPA70 siRNA, and left uninduced or induced with DOX. Levels of  $\gamma$ H2AX were quantified. Significance was determined by t-test. \*\*\*\*,  $P < 0.0001$ . **G.** Knockdown of CDC7 by 2 independent siRNAs was confirmed by Western blot. **H-I.** Inducible A3A<sup>WT</sup>-expressing cells were transfected with control or CDC7 siRNAs, left uninduced or induced with DOX, and treated with ATRi (3  $\mu$ M) for 8 h. Levels of PCNA and mono-ubiquitinated PCNA in the chromatin fractions were analyzed by Western blot in H. Levels of chromatin-bound RPA were quantified in 2,000 cells and shown in I. Significance was determined by t-test. \*\*\*\*,  $P < 0.0001$ . **J.** Inducible A3A<sup>WT</sup>-expressing cells were left uninduced or induced with DOX, and treated with ATRi (3  $\mu$ M) for 8 h. Roscovitine was used as indicated. Levels of chromatin-bound RPA in 2,000 cells were quantified. Significance was determined by t-test. \*\*\*\*,  $P < 0.0001$ .
