# Supplementary material
Source: PubMed Central journal article supplement (PMC5609510)
Supplement: NIHMS875371-supplement-6.pdf [file NIHMS875371-supplement-6.pdf]

**A**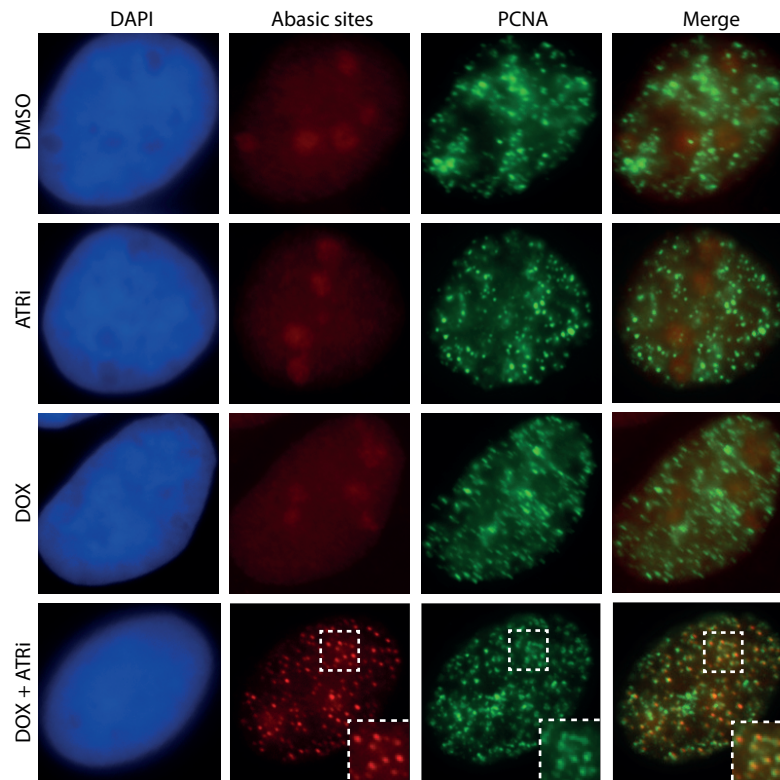**B**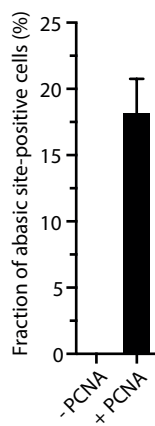**C**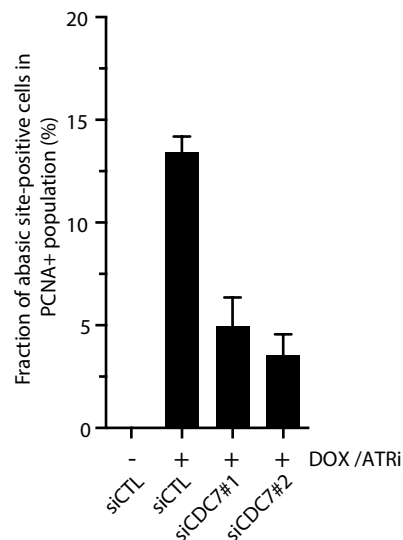**D**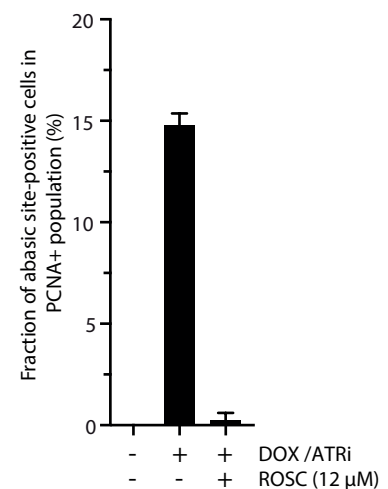

**Supplementary Figure S6. Association of APOBEC3A- and ATRi-induced abasic sites with DNA replication.** **A.** Inducible A3A<sup>WT</sup>-expressing cells were left uninduced or induced with DOX, and treated with DMSO or ATRi (3  $\mu$ M) for 8 h in the presence of ARP (3 mM). Representative images of abasic sites and PCNA staining are shown. **B.** Fractions of abasic site-positive cells in PCNA-negative and PCNA-positive cell populations were quantified. Error bar: S. D. (n = 3). **C.** Inducible A3A<sup>WT</sup>-expressing cells were transfected with control or CDC7 siRNAs, left uninduced or induced with DOX, and treated with ATRi (3  $\mu$ M) for 8 h. Fractions of abasic site-positive cells in PCNA-positive cell populations were quantified. Error bar: S. D. (n = 3). **D.** Inducible A3A<sup>WT</sup>-expressing cells were left uninduced or induced with DOX, and treated with ATRi (3  $\mu$ M) for 8 h. Roscovitine was used as indicated. Fractions of abasic site-positive cells in PCNA-positive cell populations were quantified. Error bar: S. D. (n = 3).
