# Supplementary material
Source: PubMed Central journal article supplement (PMC5609510)
Supplement: NIHMS875371-supplement-8.pdf [file NIHMS875371-supplement-8.pdf]

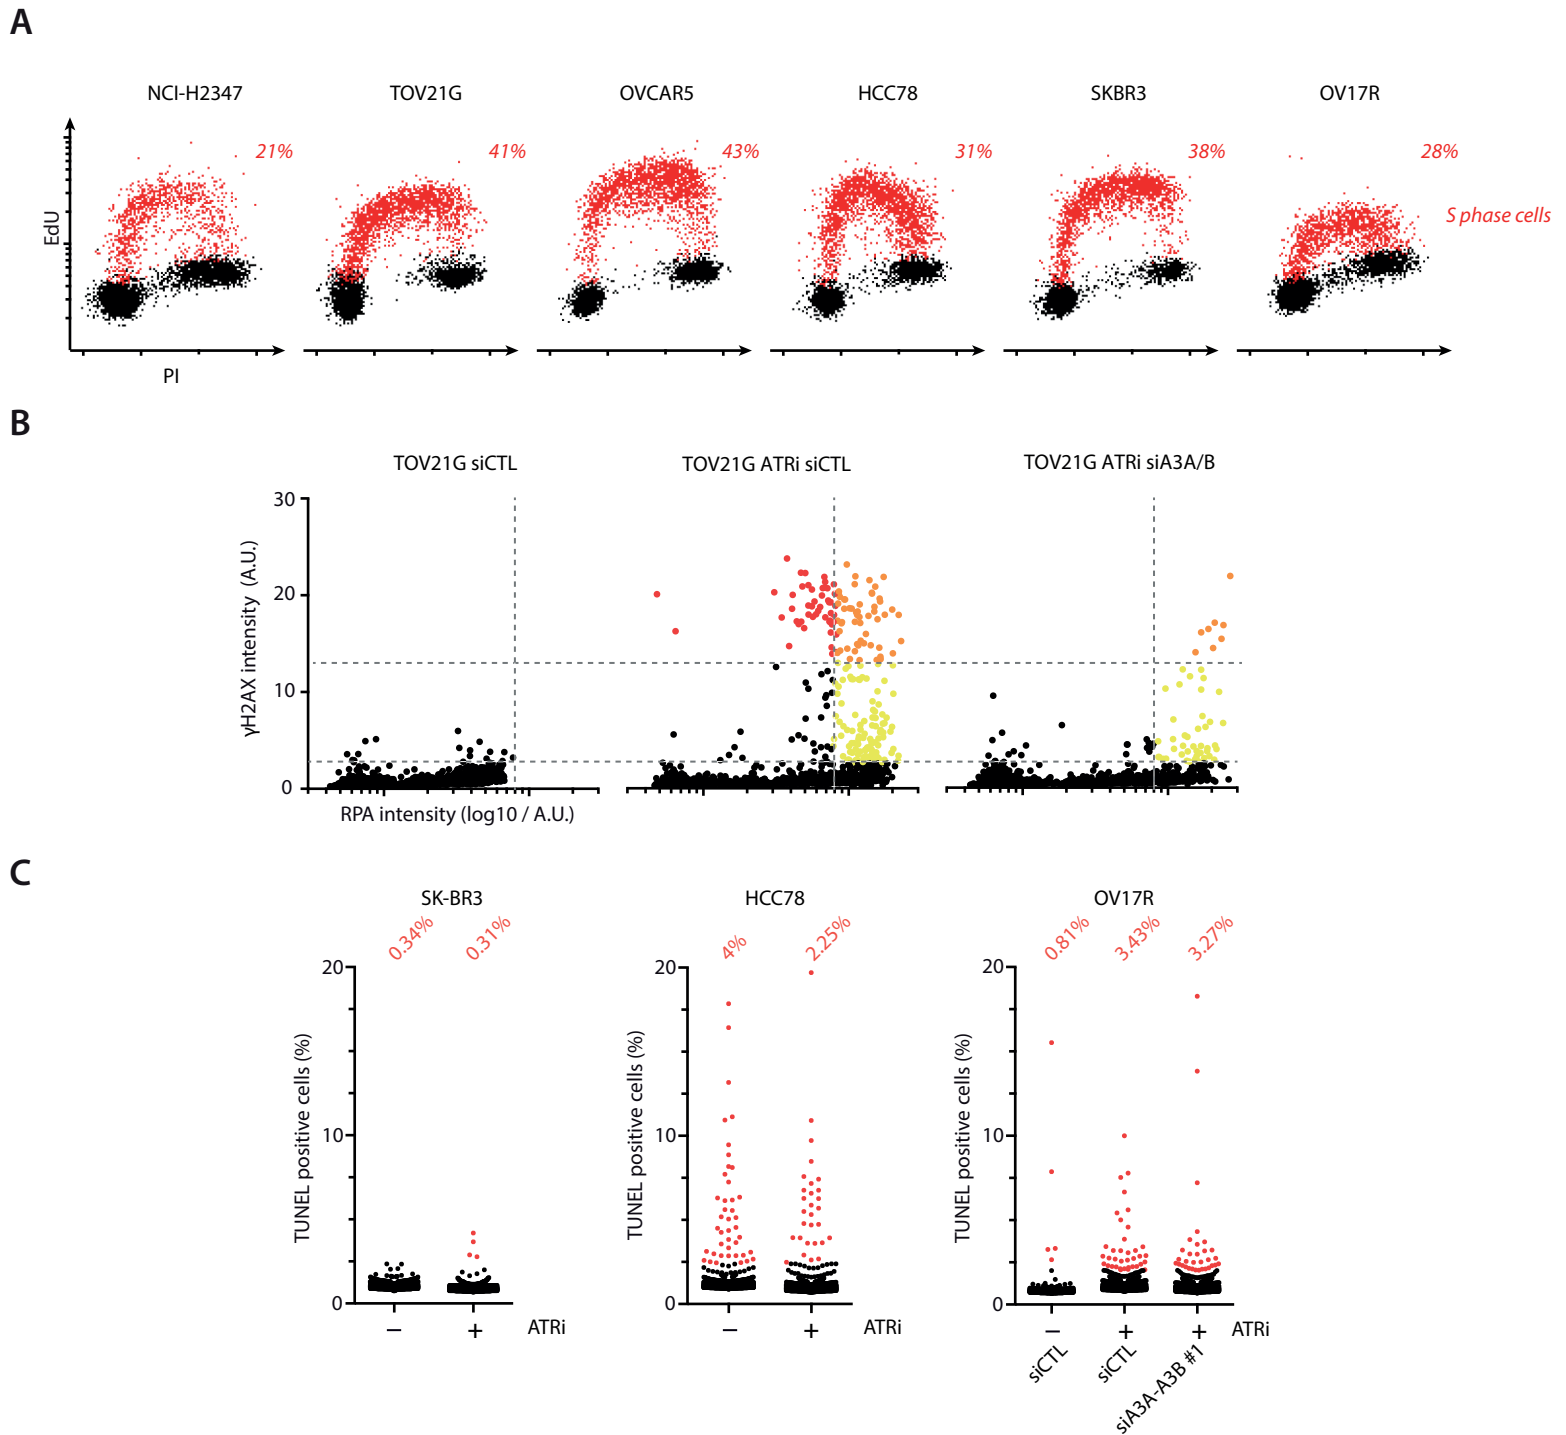

**Supplementary Figure S7. Endogenous APOBEC3A and APOBEC3B render cancer cells susceptible to ATRi.** **A.** Cell-cycle profiles of the cancer cell lines analyzed. The indicated cell lines were pulse labeled with EdU and analyzed by FACS. S-phase cells are colored in red. **B.** TOV21G cells were transfected with control or A3A-A3B siRNA and treated with ATRi (6  $\mu$ M) for 8h. Levels of chromatin-bound RPA and  $\gamma$ H2AX in 2,500 cells were quantified. **C.** The three cell lines with low overall A3A-A3B activity were transfected with control or A3A-A3B siRNA as indicated, and treated with ATRi (6  $\mu$ M) for 8 h. TUNEL signals were quantified for each condition.
